# Supplementary material for: Correlation between Photocatalytic Properties of ZnO and Generation of Hydrogen Peroxide—Impact of Composite ZnO/TiO2 Rutile and Anatase
Source: MDPI journal article supplement (doi:10.3390/catal12111445), 2022-11-15
Supplement: s1 [file s1]

Supplementary Materials

# Correlation between Photocatalytic Properties of ZnO and Generation of Hydrogen Peroxide—Impact of Composite ZnO/TiO<sub>2</sub> Rutile and Anatase

Nouha Mediouni <sup>1,2</sup>, Frederic Dappozze <sup>1</sup>, Lhoussain Khrouz <sup>3</sup>, Stephane Parola <sup>3</sup>, Abdesslem Ben Haj Amara <sup>2</sup>, Hafsia Ben Rhaïem <sup>2</sup>, Nicole Jaffrezic-Renault <sup>4</sup>, Philippe Namour <sup>5</sup> and Chantal Guillard <sup>1,\*</sup>

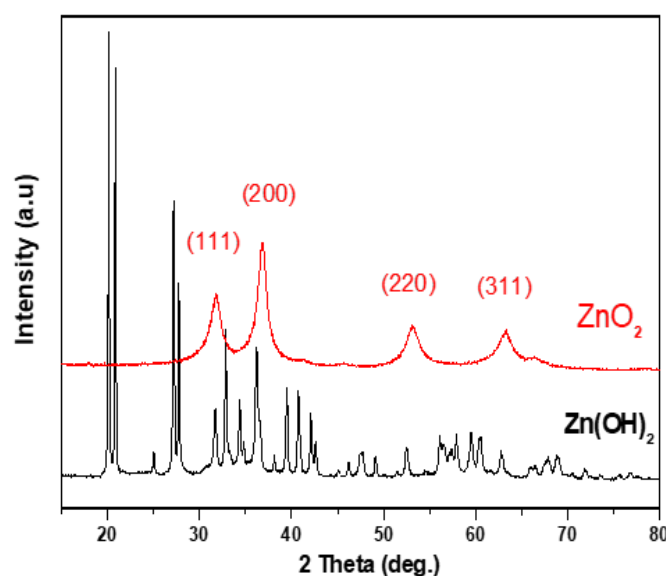

Figure S1. X-ray diffraction (XRD) patterns of elaborated precursors Zn(OH)<sub>2</sub> and ZnO<sub>2</sub>.

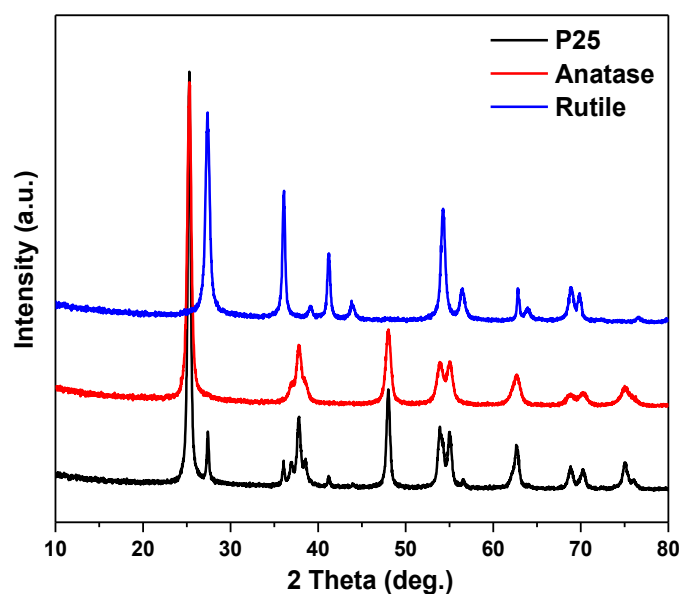

Figure S2. X-ray diffraction patterns of commercial TiO<sub>2</sub> (P25, anatase, and rutile).

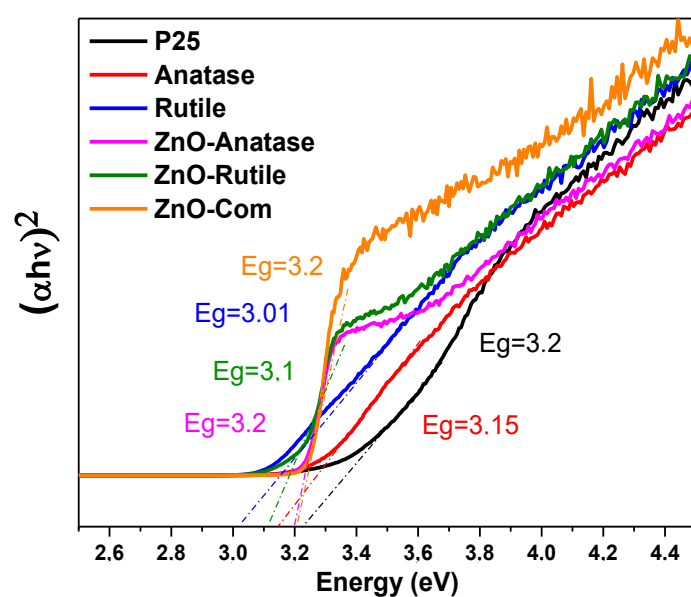

**Figure S3.** Bandgap determination for  $\text{TiO}_2$  samples, commercial ZnO as a reference, and composite (ZnO-Anatase and ZnO-Rutile).

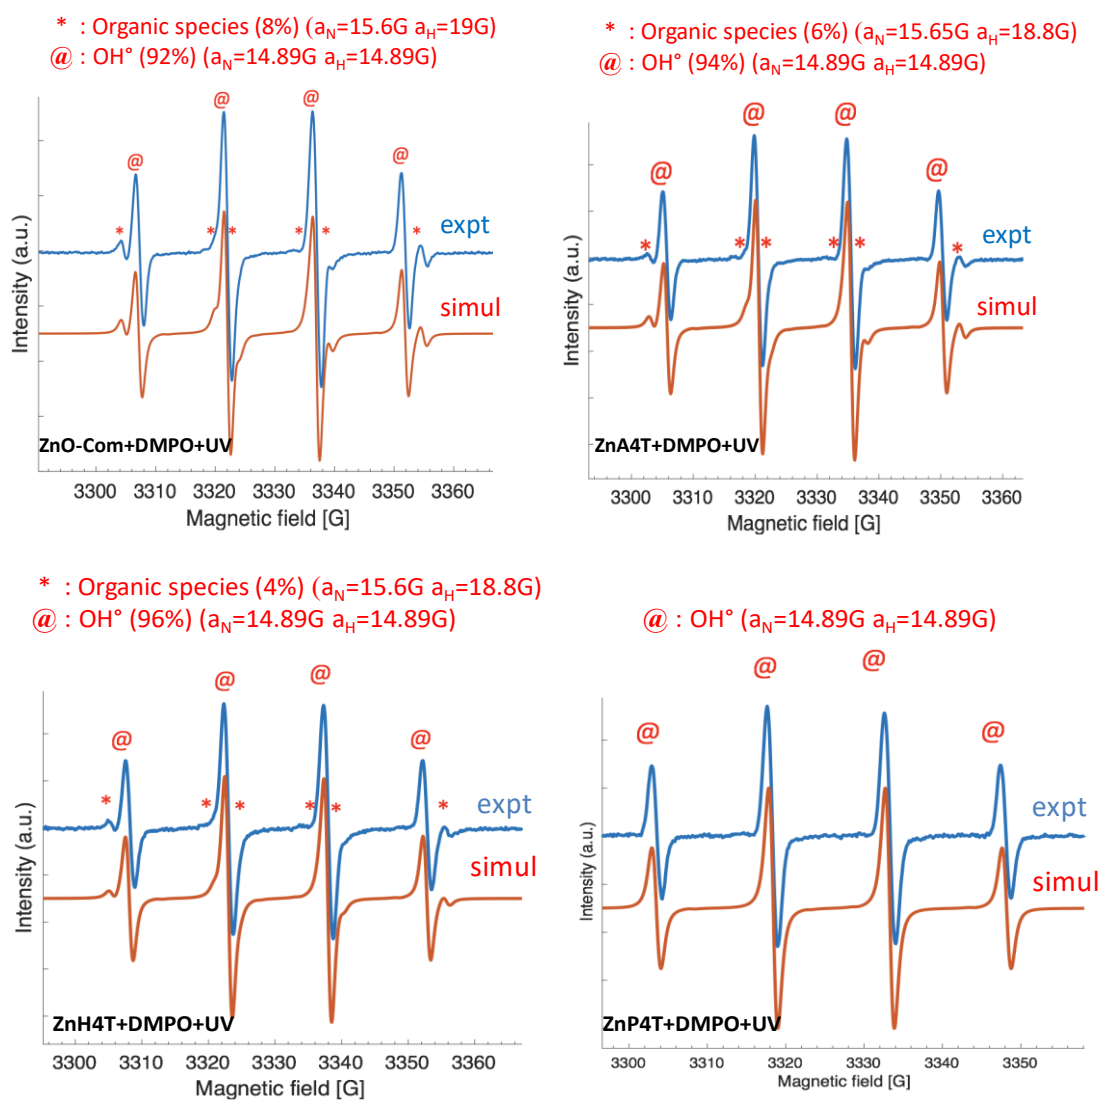

**Figure S4.** EPR spectra (Experimental and simulation) of the different ZnO.

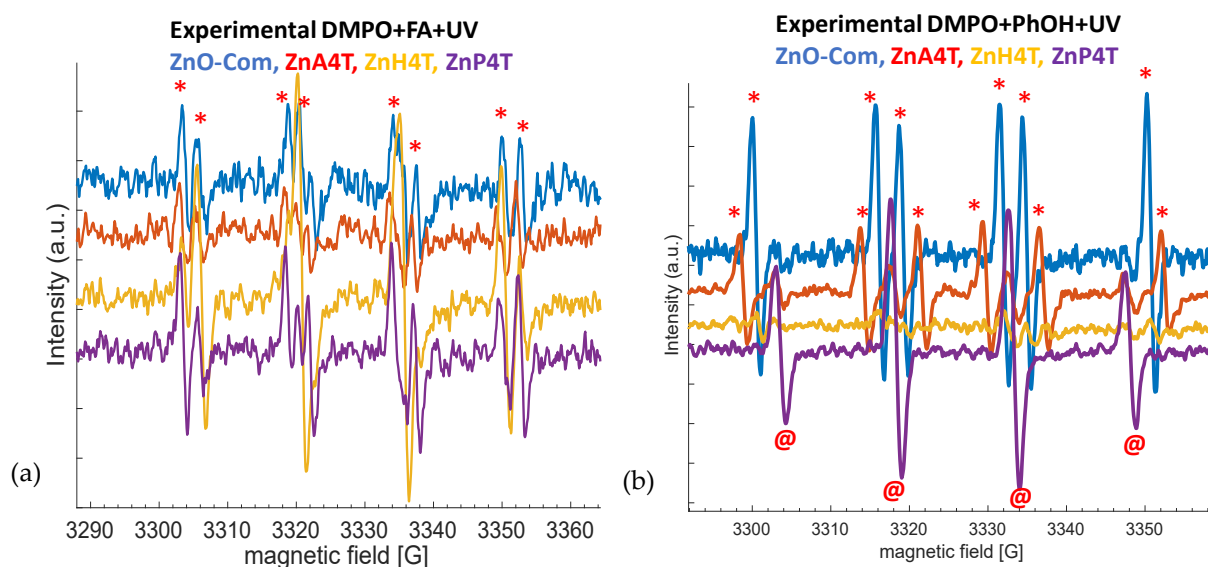

**Figure S5.** EPR spectra of ZnO photocatalysts in presence of DMPO-Formic acid (a) and DMPO-Phenol (b). (\*: organic species; @: OH° radicals).

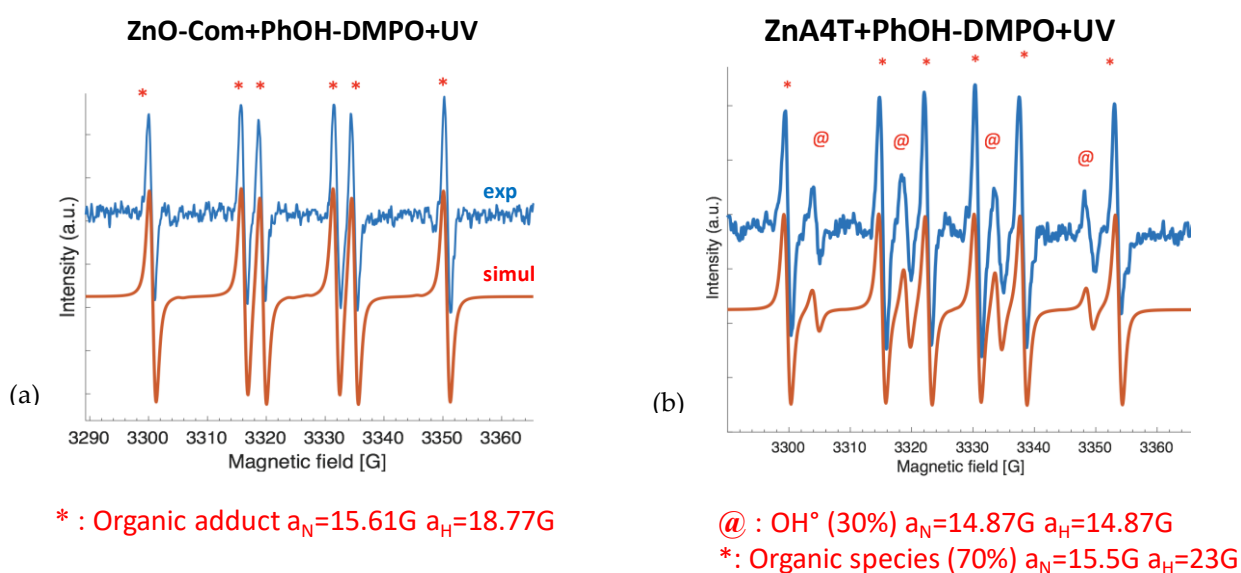

**Figure S6.** EPR spectra (Experimental and simulation) of DMPO-Phenol in the presence of commercial ZnO (a) and ZnA4T (b).

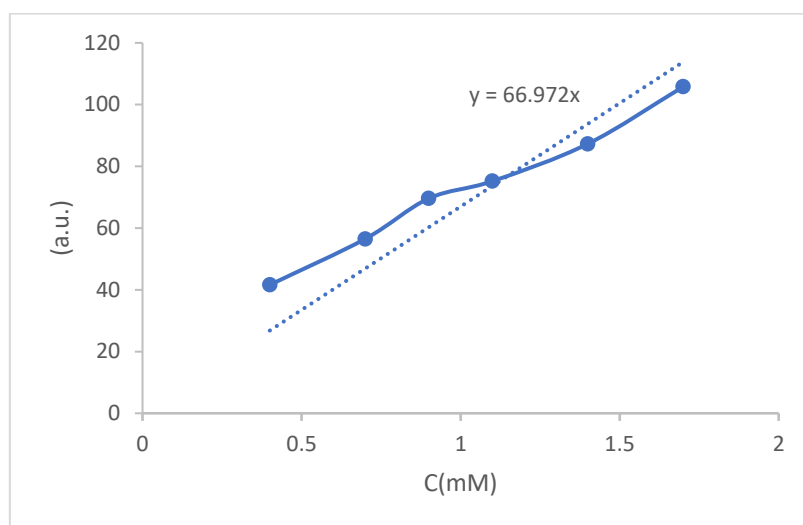

**Figure S7.** Calibration curve of OH° radicals obtained with DMPO.
